# Supplementary material
Source: publisher figshare collection journal article supplement (https://tandf.figshare.com/ndownloader/files/31262235)
Supplement: Supplementary file 1 [file 31262235]

## Sheet: Sheet1
Table S6. Preparation of transition metal components IVM-CDM
For preparation of IVM-CDM the metal mixture and manganese solution has to be adjusted compared to the recipe of Kloosterman et al., 2006.
Recipe below is for 25 mL 100X stock of metal mixture and 10 mL a 1000X stock Manganese solution. All other medium components can be prepared as described previously.
For manganese and cobalt in vivo samples were below the detection limit of 40 µg/L. Therefore, cobalt and manganese levels in IVM-CDM were set at 40 µg/L
Concentrations used in IVM-CDM is based on the mean concentration of transition metal levels in nasal fluid collected from the inferior turbinate by Schirmer strip from 10 indivuals during the winter and the summer season.
Metal mixture:
Chemicals:
Copper standard solution, concentrate, 1,000 mg Cu in water (from CuCl2) Titrisol® standard for AAS (Merck)
Cobalt standard solution, concentrate, 1,000 mg Co in water (from CoCl2) Titrisol® standard for AAS (Merck)
Zinc standard solution, concentrate, 1,000 mg Zn in 0.06% hydrochloric acid (from ZnCl₂) Titrisol® standard for AAS (Merck)
Magnesium standard solution, concentrate, 1,000 mg Mg in 6% hydrochloric acid (from MgCl2) Titrisol® standard for AAS (Merck)
Calcium standard solution, concentrate, 1,000 mg Ca in 6.5% hydrochloric acid (from CaCl2) Titrisol® standard for AAS (Merck)
Iron standard solution, concentrate, 1,000 mg Fe in 15% hydrochloric acid (from FeCl3) Titrisol® standard for AAS (Merck)
All standards are dissolved in 50 mL of the indicated buffer
Preparation:
Divalent cation	Mg2+	Ca2+	Co2+	Cu2+	Zn2+	Fe3+
mean conc in vivo (µg/L)	34023.7	70105.9	40	410.632	786.594	1174.23
Desired conc 100x stock (µg/L)	3.40237e+06	7010589	4000	41063.2	78659.4	117423
Desired amount (µg) in 25 mL	85059.3	175265	100	1026.58	1966.49	2935.57
Desired amount (mg) in 25 ml	85.0593	175.265	0.1	1.02658	1.96649	2.93557
Required volume (mL) from standard solution	4.25297	8.76324	0.005	0.051329	0.0983243	0.146779
Fill up 20 ml using MilliQ (6.68 mL)
Adjust pH to ~1.9 using 5M NaOH while stirring (higher pH will lead to precipitate formation)
Add up to 25 mL using MilliQ
Manganese solution:
Chemicals:
Manganese standard solution, concentrate, 1,000 mg Mn in water (from MnCl2) Titrisol® standard for AAS (Merck)
Standard is dissolved in 50 mL of the indicated buffer
Preparation:
Divalent cation	Mn2+
mean conc in vivo (µg/L)	40
Desired conc 1000x stock (µg/L)	40000
Desired amount (µg) in 10 mL	400
Desired amount (mg) in 10 ml	0.4
Required volume (mL) from standard solution	0.02
Fill up to 10 ml using MilliQ (9.98 mL)
